# Supplementary material for: Destructive interactions of dirhodium(ii) tetraacetate with β metallothionein rh1a
Source: Royal Society of Chemistry journal article supplement (doi:10.1039/c5cc10319c), 2016-01-01
Supplement: c5cc10319c1.pdf [file c5cc10319c1.pdf]

**Electronic Supplementary Information**

**Deconstruction of a Metallodrug: Mechanism of Drug Resistance by the 9 Cysteines in  $\beta$ -  
Metallothionein rh1a**

Daisy. L. Wong,<sup>a</sup> and Martin. J. Stillman<sup>a</sup>

*<sup>a</sup>Department of Chemistry*

*The University of Western Ontario*

*London, ON, N6A 5B7, Canada†*

*E-mail:stillman@uwo.ca*

*Web: [www.stillmangroup.ca](http://www.stillmangroup.ca)*

## **Experimental Procedure**

### **Preparation of recombinant human Metallothionein1a**

Preparation of isolated MT domain fragments followed previously reported methods.<sup>[1]</sup> The amino acid sequence for the isolated domain used in this study was based on the recombinant human MT1a 38-residue  $\beta$ -MT domain fragment sequence (MGKAAAACSC ATGGSCTCTG SCKCKECKCN SCKKAAAA). Each of the corresponding DNA sequences was inserted as an N-terminal S-tag fusion protein into pET29a plasmids and individually expressed in Escherichia coli BL21- (DE3) with cadmium-supplemented growth medium. The protein was expressed and purified as the cadmium saturated form for stability. All purified protein solutions were evacuated and saturated with argon to impede cysteine oxidation.

### **Preparation of apo- $\beta$ -Metallothionein**

Cadmium was removed from the purified, isolated MT domains by acidifying the protein solutions to pH 2.7. The protein was desalted and buffer exchanged with argon-saturated deionized water, returned to neutral pH, and concentrated using Millipore Amicon Ultra-4 centrifuge filter units (3 kDa MWCO). Protein concentrations of the final, pH-adjusted apo- $\beta$ -MT solutions were determined by cadmium remetalation of small fractions of each protein monitored using UV-visible absorption (Cary 50, Varian Canada):  $\epsilon_{250}$  values of  $\text{Cd}_3$ - $\beta$ -MT is  $36000 \text{ M}^{-1} \text{ cm}^{-1}$ . Protein solutions were diluted to a final concentration of  $10 \mu\text{M}$ .

### **Preparation of $\text{Rh}_2(\text{OAc})_4$ solutions**

Stock solutions of  $500 \mu\text{M}$  dirhodium(II) tetraacetate (Sigma-Aldrich) were freshly prepared in deionized water, evacuated and argon saturated. The MT cysteine concentration was determined and two-fold excess of  $\text{Rh}_2(\text{OAc})_4$  was added to the MT solution and mixed immediately prior to MS acquisition. The room-temperature UV-visible and circular dichroism (CD) spectra of the solutions were also measured following  $\text{Rh}_2(\text{OAc})_4$  saturation.

## Electrospray Ionization Mass Spectrometry, UV- Visible and Circular Dichroism Absorption Spectroscopy Parameters

A Bruker Micro-TOF II instrument (Bruker Daltonics, Toronto, ON) operated in positive ion mode was used to collect the data. NaI was used as an external calibrant. The following settings were used: scan,  $m/z$  500–3000; rolling average, 2; nebulizer, 2 bar; dry gas, 80°C at a rate of 8.0 L/min; capillary, 4000 V; end plate offset, –500 V; capillary exit, 175 V; skimmer 1, 30.0 V; skimmer 2, 23.5 V; hexapole RF, 800 V. The spectra were collected continuously over 1 hr and time slices were deconvoluted using the Maximum Entropy algorithm of the Bruker Compass DataAnalysis software package. A Jasco J810 spectropolarimeter was used to collect CD spectral data. The following scan parameters were used: step scan; range, 800–200 nm; data pitch, 1 nm; bandwidth, 0.5 nm; response, 1 s.

## Molecular Dynamics Calculations

A minimized structure of the 38-residue  $\text{Cd}_3$ - $\beta$ -MT1a domain fragment was used (Scigress MM3/MD method with augmented force field; Fujitsu Poland) <sup>[2]</sup> to test if the  $\text{Rh}_2^{4+}$  core could be reasonably coordinated by 8 of the 9 cys of the  $\beta$ -MT1a. The three  $\text{Cd}^{2+}$  ions were deleted from the original structure and the  $\text{Rh}_2^{4+}$  core inserted using cys thiolate connections that were in close proximity to the 8 x/y ligand positions on the  $\text{Rh}_2^{4+}$  core. The alignment of the core was locked to stop rotation about the Rh-Rh bond. The molecular dynamics calculation was carried out for 200 ps at an average temperature of 355 K with 2 fs steps using a dielectric of 78.5. The initial structure relaxed immediately then was stable.

## References

- 1 T. B. J. Pinter, G. W. Irvine, and M. J. Stillman, *Biochemistry*. 2015, **54**, 5006.
- 2 K. E. Rigby, J. Chan, J. Mackie, and M. J. Stillman, *Proteins: Struct., Funct., Bioinf.* 2006, **62**, 159.
